# Supplementary material
Source: PubMed Central journal article supplement (PMC4326672)
Supplement: NIHMS62172-supplement-Supplemental_Materials.pdf [file NIHMS62172-supplement-Supplemental_Materials.pdf]

## Supplemental material

1  
2  
3  
4  
5  
6  
7  
8  
9  
10  
11  
12  
13  
14  
15  
16  
17  
18

### Contents:

1. eFigure 1. Clinical markers in a pooled analysis comparing all *GBA* mutation positive individuals versus controls.
2. eFigure 2. Clinical markers in a pooled analysis comparing all *GBA* mutation positive individuals versus controls.
3. eTable 1. Two year follow-up data when *GBA* mutation positive individuals with parkinsonian signs are excluded.
4. eTable 2. Demographic, clinical and genetic characteristics of *GBA* mutation positive individuals with parkinsonism versus those without parkinsonism.
5. eTable 3. Baseline and follow-up clinical markers in a comparison of *GBA* mutation positive individuals with parkinsonism and *GBA* mutation positive individuals without parkinsonism.

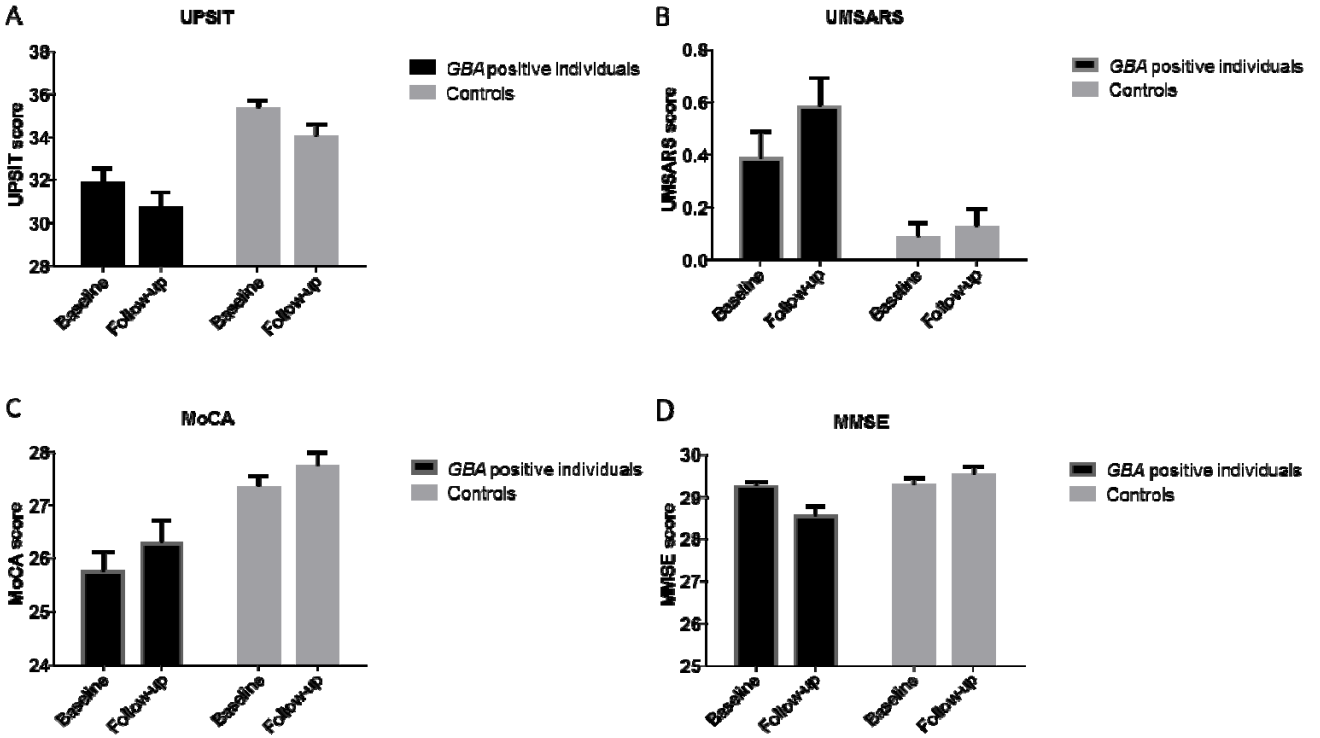

19

20

21 **eFigure 1. Clinical markers in a pooled analysis comparing all GBA mutation**  
 22 **positive individuals versus controls.**

23 Figures demonstrate mean baseline and follow-up UPSIT scores (A), mean baseline and follow-up UMSARS scores (B), mean  
 24 baseline and follow-up MoCA scores (C), and mean baseline and follow-up MMSE scores (D) for GBA positive individuals compared  
 25 to controls. Means are plotted together with the SEM.

26

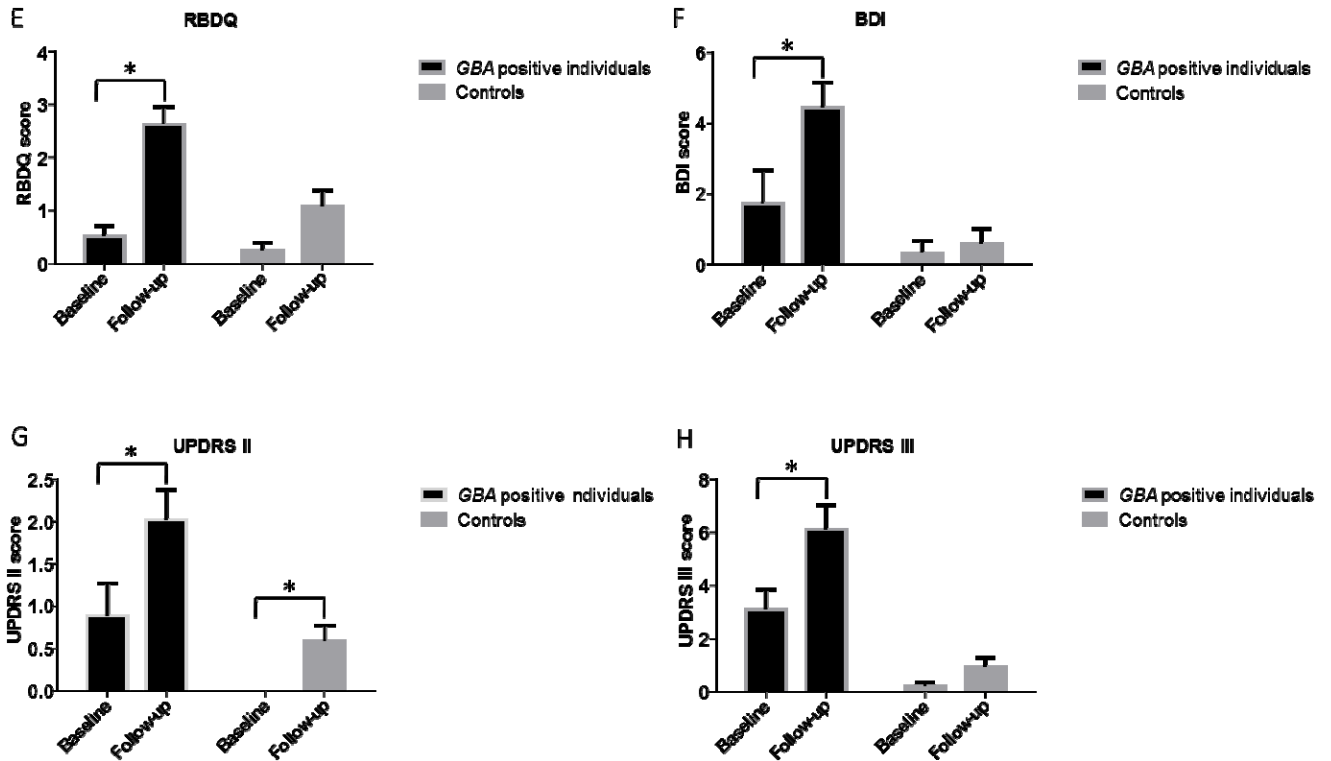

27  
 28  
 29  
 30  
 31  
 32  
 33  
 34  
 35  
 36  
 37  
 38  
 39  
 40  
 41  
 42  
 43  
 44  
 45

**eFigure 2. Clinical markers in a pooled analysis comparing all GBA mutation positive individuals versus controls.**

Figures demonstrate a statistically significant increase in mean follow-up RBDQ (E), depression (F), and UPDRS III (H) scores in GBA mutation positive individuals compared to controls, and mean baseline and follow-up UPDRS II scores in GBA mutation positive individuals and controls (G). Means are plotted together with the SEM.

46

47 **eTable 1. Two year follow-up data when *GBA* mutation positive individuals with**  
 48 **parkinsonian signs are excluded.**  
 49

|               |                                | Type 1 GD patients<br>(n=26) | Heterozygous <i>GBA</i><br>mutation carriers<br>(n=26) | Controls<br>(n=26) | <i>P</i> (between) <sup>b</sup> |                       |                       |
|---------------|--------------------------------|------------------------------|--------------------------------------------------------|--------------------|---------------------------------|-----------------------|-----------------------|
|               |                                |                              |                                                        |                    | <i>P</i> <sup>1</sup>           | <i>P</i> <sup>2</sup> | <i>P</i> <sup>3</sup> |
| <b>UPSIT</b>  | Baseline                       | 32.71 (1.09)                 | 31.68 (0.89)                                           | 35.32 (0.40)       |                                 |                       |                       |
|               | Follow-up                      | 31.29 (1.13)                 | 30.68 (1.15)                                           | 33.95 (0.62)       | .001 <sup>c</sup>               | .001 <sup>c</sup>     | .96                   |
|               | <i>P</i> (within) <sup>a</sup> | .03                          | .27                                                    | .13                |                                 |                       |                       |
| <b>UMSARS</b> | Baseline                       | 0.31 (0.14)                  | 0.39 (0.16)                                            | 0.08 (0.06)        |                                 |                       |                       |
|               | Follow-up                      | 0.42 (0.13)                  | 0.46 (0.15)                                            | 0.13 (0.07)        | .14                             | .05                   | 1.00                  |
|               | <i>P</i> (within) <sup>a</sup> | .32                          | .90                                                    | .32                |                                 |                       |                       |
| <b>RBDQ</b>   | Baseline                       | 0.88 (0.31)                  | 0.11 (0.11)                                            | 0.25 (0.14)        |                                 |                       |                       |
|               | Follow-up                      | 2.96 (0.62)                  | 2.36 (0.42)                                            | 1.08 (0.30)        | .34                             | 1.00                  | .32                   |
|               | <i>P</i> (within) <sup>a</sup> | <.001 <sup>c</sup>           | <.001 <sup>c</sup>                                     | .07                |                                 |                       |                       |
| <b>MMSE</b>   | Baseline                       | 29.23 (0.16)                 | 29.29 (0.19)                                           | 29.28 (0.16)       |                                 |                       |                       |
|               | Follow-up                      | 28.42 (0.54)                 | 28.71 (0.33)                                           | 29.50 (0.21)       | .001 <sup>c</sup>               | .006 <sup>c</sup>     | 1.00                  |
|               | <i>P</i> (within) <sup>a</sup> | .09                          | .11                                                    | .30                |                                 |                       |                       |
| <b>MoCA</b>   | Baseline                       | 26.23 (0.56)                 | 25.93 (0.55)                                           | 27.32 (0.23)       |                                 |                       |                       |
|               |                                |                              |                                                        |                    | <.001 <sup>c</sup>              |                       | 1.00                  |

|                                |                                |                           |                                                  |                   | <.001 <sup>c</sup>              |                       |                       |
|--------------------------------|--------------------------------|---------------------------|--------------------------------------------------|-------------------|---------------------------------|-----------------------|-----------------------|
|                                |                                | 26.42 (0.83)              | 26.44 (0.55)                                     | 27.73 (0.26)      |                                 |                       |                       |
| <i>P</i> (within) <sup>a</sup> |                                | .70                       | .13                                              | .20               |                                 |                       |                       |
|                                |                                | Type 1 GD patients (n=26) | Heterozygous <i>GBA</i> mutation carriers (n=26) | Controls (n=26)   | <i>P</i> (between) <sup>b</sup> |                       |                       |
|                                |                                |                           |                                                  |                   | <i>P</i> <sup>1</sup>           | <i>P</i> <sup>2</sup> | <i>P</i> <sup>3</sup> |
| <b>UPDRS II</b>                | Baseline                       | 1.44 (0.96)               | 0.36 (0.23)                                      | 0.00 (0.00)       |                                 |                       |                       |
|                                | Follow-up                      | 2.16 (0.65)               | 1.29 (0.32)                                      | 0.58 (0.19)       | .04                             | 1.00                  | .009 <sup>c</sup>     |
|                                | <i>P</i> (within) <sup>a</sup> | .01 <sup>c</sup>          | .001 <sup>c</sup>                                | .006 <sup>c</sup> |                                 |                       |                       |
| <b>UPDRS III</b>               | Baseline                       | 2.29 (0.62)               | 1.32 (0.43)                                      | 0.21 (0.17)       |                                 |                       |                       |
|                                | Follow-up                      | 5.29 (1.25)               | 3.79 (0.59)                                      | 0.92 (0.37)       | <.001 <sup>c</sup>              | .05                   | .07                   |
|                                | <i>P</i> (within) <sup>a</sup> | .001 <sup>c</sup>         | <.001 <sup>c</sup>                               | .06               |                                 |                       |                       |
| <b>BDI</b>                     | Baseline                       | 3.00 (1.99)               | 0.65 (0.41)                                      | 0.33 (0.33)       |                                 |                       |                       |
|                                | Follow-up                      | 5.65 (1.27)               | 2.88 (0.68)                                      | 0.58 (0.43)       | .15                             | 1.00                  | .04                   |
|                                | <i>P</i> (within) <sup>a</sup> | .10                       | .01 <sup>c</sup>                                 | .11               |                                 |                       |                       |

50  
51  
52  
53

Abbreviations: *UPSIT* Smell Identification Test, *UMSARS* Unified Multiple System Atrophy Rating Scale, *MoCA* Montreal Cognitive assessment, *MMSE* Mini-Mental State Examination, *RBDQ* Rapid Eye Movement Sleep Behaviour Disorder Questionnaire, *UPDRS* Unified Parkinson's Disease Rating Scale, *BDI* Becks Depression Inventory.

54  
55  
56

Results are presented as mean and SEM. Significance was taken at the 5% level for all variables. Only values which survived multiple comparisons with the FDR procedure were denoted significant.

57  
58  
59

Reported *P* values compare the mean values for clinical markers within groups (baseline and follow-up) and between groups (Type 1 GD, carriers and controls) at follow-up.

60  
61  
62  
63

<sup>1</sup> Controls versus Type 1 GD patients.

<sup>2</sup> Controls versus heterozygote *GBA* mutation carriers.

<sup>3</sup> Type 1 GD patients versus heterozygote *GBA* mutation carriers.

64 <sup>a</sup> Paired t-test.  
 65 <sup>b</sup> Two-way ANCOVA with Bonferroni correction.  
 66 <sup>c</sup> Statistically significant difference.  
 67

68  
 69

70 **eTable 2. Demographic, clinical and genetic characteristics of *GBA* mutation**  
 71 **positive individuals with parkinsonism versus those without parkinsonism.**

| <i>GBA</i> mutation positive individuals |                     |                        |                    |
|------------------------------------------|---------------------|------------------------|--------------------|
|                                          | Parkinsonism* (n=6) | No parkinsonism (n=52) | <i>P</i> value     |
| Age, years                               | 74.3 (3.2)          | 59.9 (1.5)             | .002 <sup>ac</sup> |
| Gender (F/M)                             | 1/5                 | 26/26                  | .14 <sup>b</sup>   |
| Ethnicity (Ashkenazi/White British)      | 3/3                 | 3/7                    | .17 <sup>b</sup>   |
| Family history of PD, %                  | 0                   | 13.5                   | .32                |
| Most frequent <i>GBA</i> allele          | N370S               | N370S                  | -                  |

72 Results are presented as mean and SEM. Significance was taken at the 5% level.  
 73 Abbreviations: *ERT* Enzyme Replacement Therapy. *SRT* Substrate Reduction Therapy.  
 74 \*Patients without Parkinson disease but with subtle evolving features of parkinsonism.  
 75 <sup>a</sup> One-way ANOVA.  
 76 <sup>b</sup> Chi-squared test.  
 77 <sup>c</sup> Statistically significant difference.  
 78  
 79  
 80  
 81  
 82

83 **eTable 3. Baseline and follow-up clinical markers in a comparison of *GBA***  
 84 **mutation positive individuals with parkinsonism and *GBA* mutation positive**  
 85 **individuals without parkinsonism.**

|              |                                | <i>GBA</i> mutation positive individuals |                        | <i>P</i> (between) <sup>b</sup> |
|--------------|--------------------------------|------------------------------------------|------------------------|---------------------------------|
|              |                                | Parkinsonism* (n=6)                      | No parkinsonism (n=52) | <i>P</i> <sup>1</sup>           |
| <b>UPSIT</b> | Baseline                       | 29.2 (2.1)                               | 32.2 (0.7)             | .16                             |
|              | Follow-up                      | 28.7 (1.6)                               | 31.0 (0.8)             |                                 |
|              | <i>P</i> (within) <sup>a</sup> | .67                                      | .02                    |                                 |

|                 |                                |                                          |                                   |                                       |
|-----------------|--------------------------------|------------------------------------------|-----------------------------------|---------------------------------------|
| <b>UMSARS</b>   | Baseline                       | 0.7 (0.5)                                | 0.4 (0.1)                         | .37                                   |
|                 | Follow-up                      | 1.8 (0.5)                                | 0.4 (0.1)                         |                                       |
|                 | <i>P</i> (within) <sup>a</sup> | .10                                      | .48                               |                                       |
| <b>RBDQ</b>     | Baseline                       | 0.8 (0.8)                                | 0.5 (0.2)                         | .60                                   |
|                 | Follow-up                      | 2.5 (0.9)                                | 2.6 (0.4)                         |                                       |
|                 | <i>P</i> (within) <sup>a</sup> | .04                                      | <.001 <sup>c</sup>                |                                       |
|                 |                                | <b>GBA mutation positive individuals</b> |                                   | <b><i>P</i> (between)<sup>b</sup></b> |
|                 |                                | <b>Parkinsonism*<br/>(n=6)</b>           | <b>No parkinsonism<br/>(n=52)</b> |                                       |
| <b>MMSE</b>     | Baseline                       | 29.0 (0.5)                               | 29.3 (0.1)                        | .52                                   |
|                 | Follow-up                      | 28.0 (0.7)                               | 28.6 (0.3)                        |                                       |
|                 | <i>P</i> (within) <sup>a</sup> | .10                                      | .02                               |                                       |
| <b>MoCA</b>     | Baseline                       | 22.8 (1.3)                               | 26.1 (0.4)                        | .009 <sup>c</sup>                     |
|                 | Follow-up                      | 24.8 (1.7)                               | 26.4 (0.5)                        |                                       |
|                 | <i>P</i> (within) <sup>a</sup> | .07                                      | .17                               |                                       |
| <b>UPDRS II</b> | Baseline                       | 1.0 (0.8)                                | 0.9 (0.4)                         | .92                                   |
|                 | Follow-up                      | 4.8 (1.4)                                | 1.7 (0.3)                         |                                       |
|                 | <i>P</i> (within) <sup>a</sup> | .03                                      | <.001 <sup>c</sup>                |                                       |

|                  |                                |            |                    |                    |
|------------------|--------------------------------|------------|--------------------|--------------------|
| <b>UPDRS III</b> | Baseline                       | 14·5 (4·1) | 1·8 (0·4)          | <·001 <sup>c</sup> |
|                  | Follow-up                      | 20·2 (4·3) | 4·5 (0·6)          |                    |
|                  | <i>P</i> (within) <sup>a</sup> | ·04        | <·001 <sup>c</sup> |                    |
| <b>BDI</b>       | Baseline                       | 0·0 (0·0)  | 1·8 (1·0)          | ·66                |
|                  | Follow-up                      | 7·5 (0·5)  | 4·3 (0·7)          |                    |
|                  |                                | ·18        | ·005 <sup>c</sup>  |                    |

86  
87  
88  
89  
90  
91  
92  
93  
94  
95  
96  
97  
98  
99  
100  
101  
102  
103

Abbreviations: *UPSIT* Smell Identification Test, *UMSARS* Unified Multiple System Atrophy Rating Scale, *MoCA* Montreal Cognitive assessment, *MMSE* Mini-Mental State Examination, *RBDQ* Rapid Eye Movement Sleep Behaviour Disorder Questionnaire, *UPDRS* Unified Parkinson's Disease Rating Scale, *BDI* Becks Depression Inventory.

\*Patients without Parkinson disease but with subtle evolving features of parkinsonism.

Results are presented as mean and SEM. Significance was taken at the 5% level for all variables. Only values which survived multiple comparisons with the FDR procedure were denoted significant.

Reported *P* values compare the mean values for clinical markers within groups (baseline and follow-up) and between groups (parkinsonism and no parkinsonism) at baseline.

<sup>1</sup> Parkinsonism versus no parkinsonism.

<sup>a</sup> Paired t-test.

<sup>b</sup> One-way ANOVA with Bonferroni correction.

<sup>c</sup> Statistically significant difference.
